# Supplementary material for: Unconventional Source of Neurotoxic Protein Aggregation from Organelle Off-Target Bax∆2 in Alzheimer’s Disease
Source: MDPI journal article supplement (doi:10.3390/biom13060970), 2023-06-10
Supplement: s1 [file s1]

Supplementary Information

**Unconventional Source of Neurotoxic Protein Aggregation from Organelle Off-Target  
Bax $\Delta$ 2 in Alzheimer's Disease**

*Biomolecules*

Qi Yao 1, Anne Caroline Mascarenhas dos Santos 1, Huaiyuan Zhang 1, Adriana Mañas 2, Ammarah Hussaini 1, Ujin Kim 1, Congtai Xu 1, Sana Basheer 1, Shinya Tasaki 3 and Jialing Xiang 1,\*

<sup>1</sup>Department of Biology, Illinois Institute of Technology, Chicago, IL 60616, USA

<sup>2</sup> Department of Laboratory Medicine, Lund University, 22381 Lund, Sweden

<sup>3</sup> Rush Alzheimer's Disease Center, Rush University Medical Center, Chicago, IL 60612, USA

\*Corresponding author:

Jialing Xiang

Department of Biology

Illinois Institute of Technology

3101 South Dearborn Street, Chicago, IL 60616, USA

Phone: (312)-567-3491

Fax: (312)-567-3494

Email: [xiang@iit.edu](mailto:xiang@iit.edu)

Fig. S1

Human brain RNA-seq databases

| Data ID     | Data type | Female (%) | AD (N) | NCI (N) |
|-------------|-----------|------------|--------|---------|
| syn8612097  | RNA-seq   | 64%        | 253    | 201     |
| syn24175555 | RNA-seq   | 75%        | 71     | 126     |

**Note:** AD, Alzheimer's disease; NCI: None Cognitive impair

Fig. S2

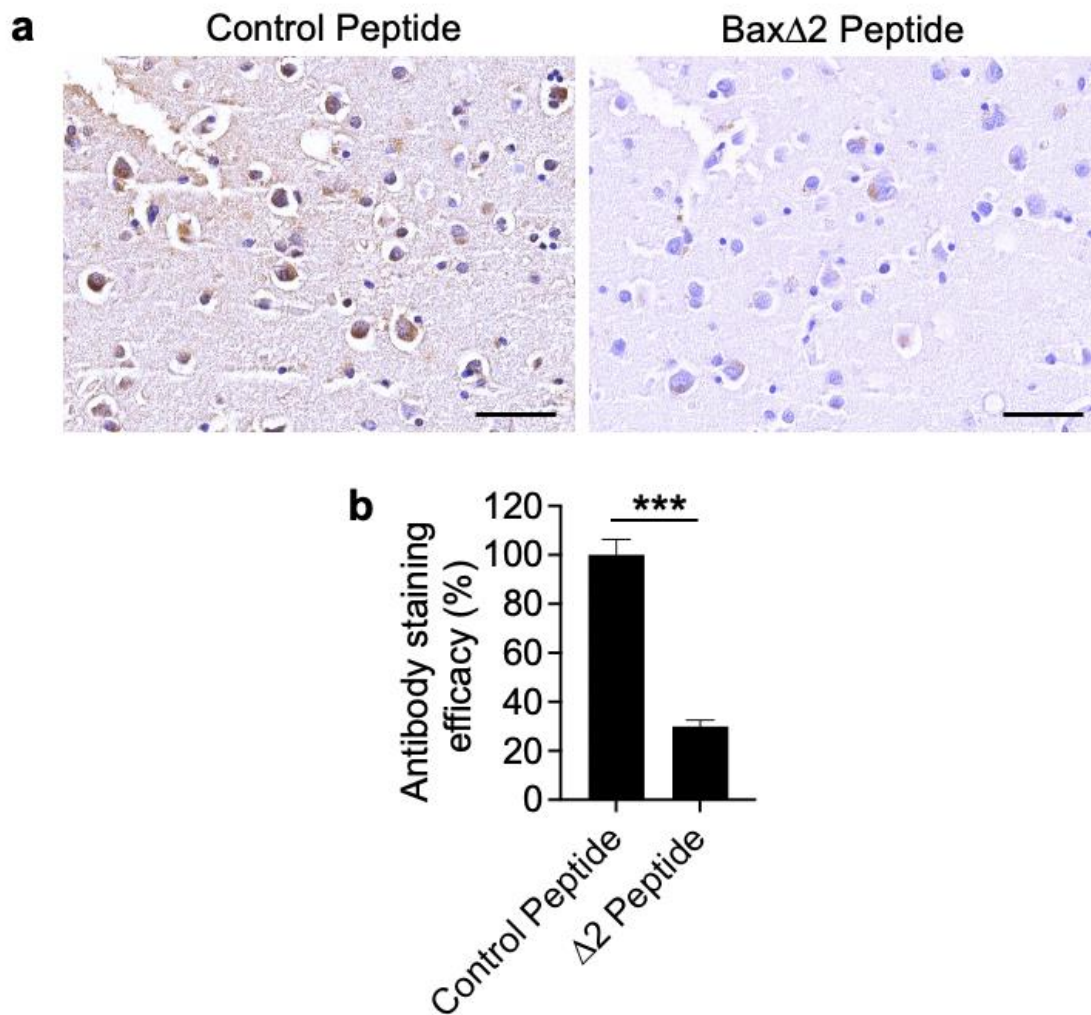

**Caption:** **a** Immunostaining of human brain tissues with anti-Bax $\Delta$ 2 antibody in the presence of Bax $\alpha$  (control) or Bax $\Delta$ 2 antigen peptide. Scale bars, 50  $\mu$ m. **b** Quantitation of (a) using Cell-Profiler software and analyzed by non-parametric statistical analysis, \*\*\*  $p < 0.001$

Fig. S3

## Human Brain Tissue information

| Patient | Source   | Gender | APOE genotype | Age death | Braaksc | Cogdx |
|---------|----------|--------|---------------|-----------|---------|-------|
| 1       | RADC     | M      | 33            | 77        | 2       | 1     |
| 2       | RADC     | F      | 33            | 87        | 4       | 1     |
| 3       | RADC     | F      | 33            | 79        | 3       | 1     |
| 4       | RADC     | F      | 33            | 82        | 1       | 1     |
| 5       | RADC     | M      | 33            | 72        | 0       | 1     |
| 6       | Biochain | M      | N/A           | 54        | N/A     | 1     |
| 7       | Biomax   | M      | N/A           | 38        | N/A     | 1     |
| 8       | Biomax   | F      | N/A           | 18        | N/A     | 1     |
| 9       | Biomax   | M      | N/A           | 15        | N/A     | 1     |
| 10      | RADC     | M      | 33            | 88        | 4       | 4     |
| 11      | RADC     | F      | 33            | 90        | 3       | 4     |
| 12      | RADC     | F      | 34            | 86        | 5       | 4     |
| 13      | RADC     | F      | 33            | 89        | 4       | 4     |
| 14      | RADC     | F      | NA            | 78        | 5       | 4     |
| 15      | RADC     | M      | 34            | 87        | 5       | 4     |
| 16      | RADC     | M      | 34            | 89        | 6       | 4     |
| 17      | RADC     | F      | 44            | 83        | 5       | 4     |
| 18      | RADC     | M      | 33            | 86        | 5       | 4     |
| 19      | RADC     | M      | 23            | 89        | 4       | 4     |
| 20      | Biochain | M      | N/A           | 73        | N/A     | 4     |
| 21      | Biochain | F      | N/A           | 85        | N/A     | 4     |
| 22      | Biochain | M      | N/A           | 88        | N/A     | 4     |

**Note:** RADC, Rush Alzheimer's Disease Center.

Braaksc, Braak stages: stage 1 and 2 indicate NFTs confined mainly to the entorhinal region of the brain; stage 3 and 4 indicate involvement of limbic regions such as the hippocampus; stage 5 and 6 indicate moderate to severe neocortical involvement.

Cogdx, Clinical Consensus Diagnosis, 1 = non-AD, 4 = AD.

Fig. S4

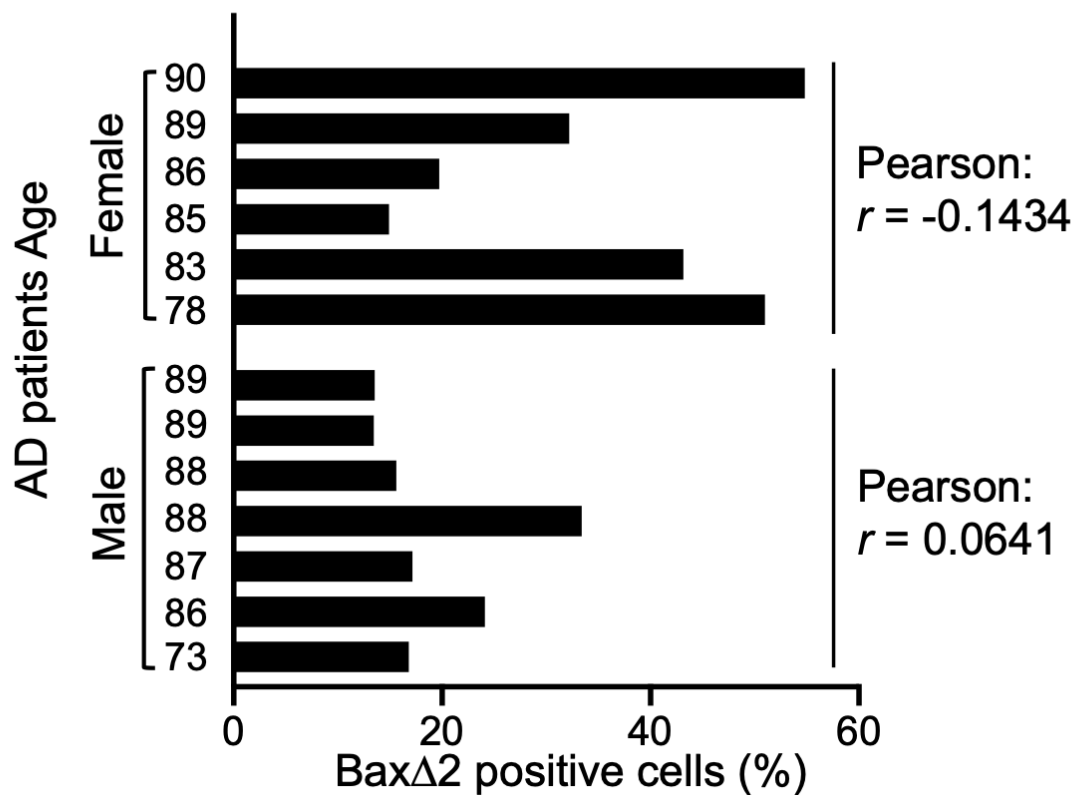

**Caption:** Correlation histogram graph of BaxΔ2 positivity and AD patients' age. Pearson numbers indicate the correlation between the X (BaxΔ2 positive cells) and Y (AD female or male patients' age) axes.

Fig. S5

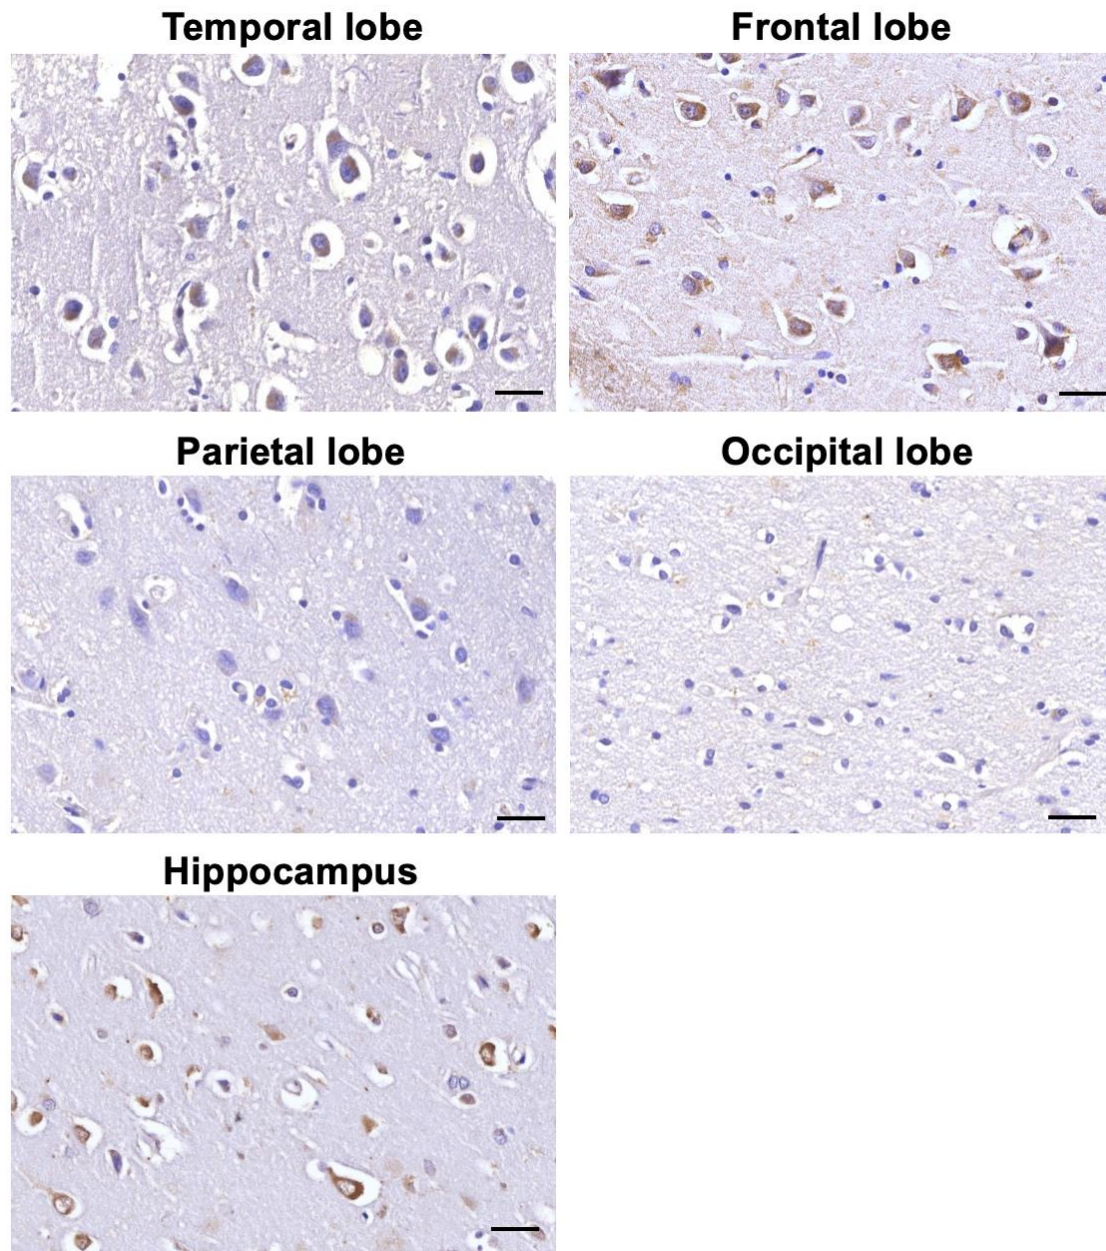

**Caption:** Immunostaining of Bax $\Delta$ 2 proteins in different brain regions from a 73-year-old male AD patient. Scale bars, 50  $\mu$ m.



Fig. S6

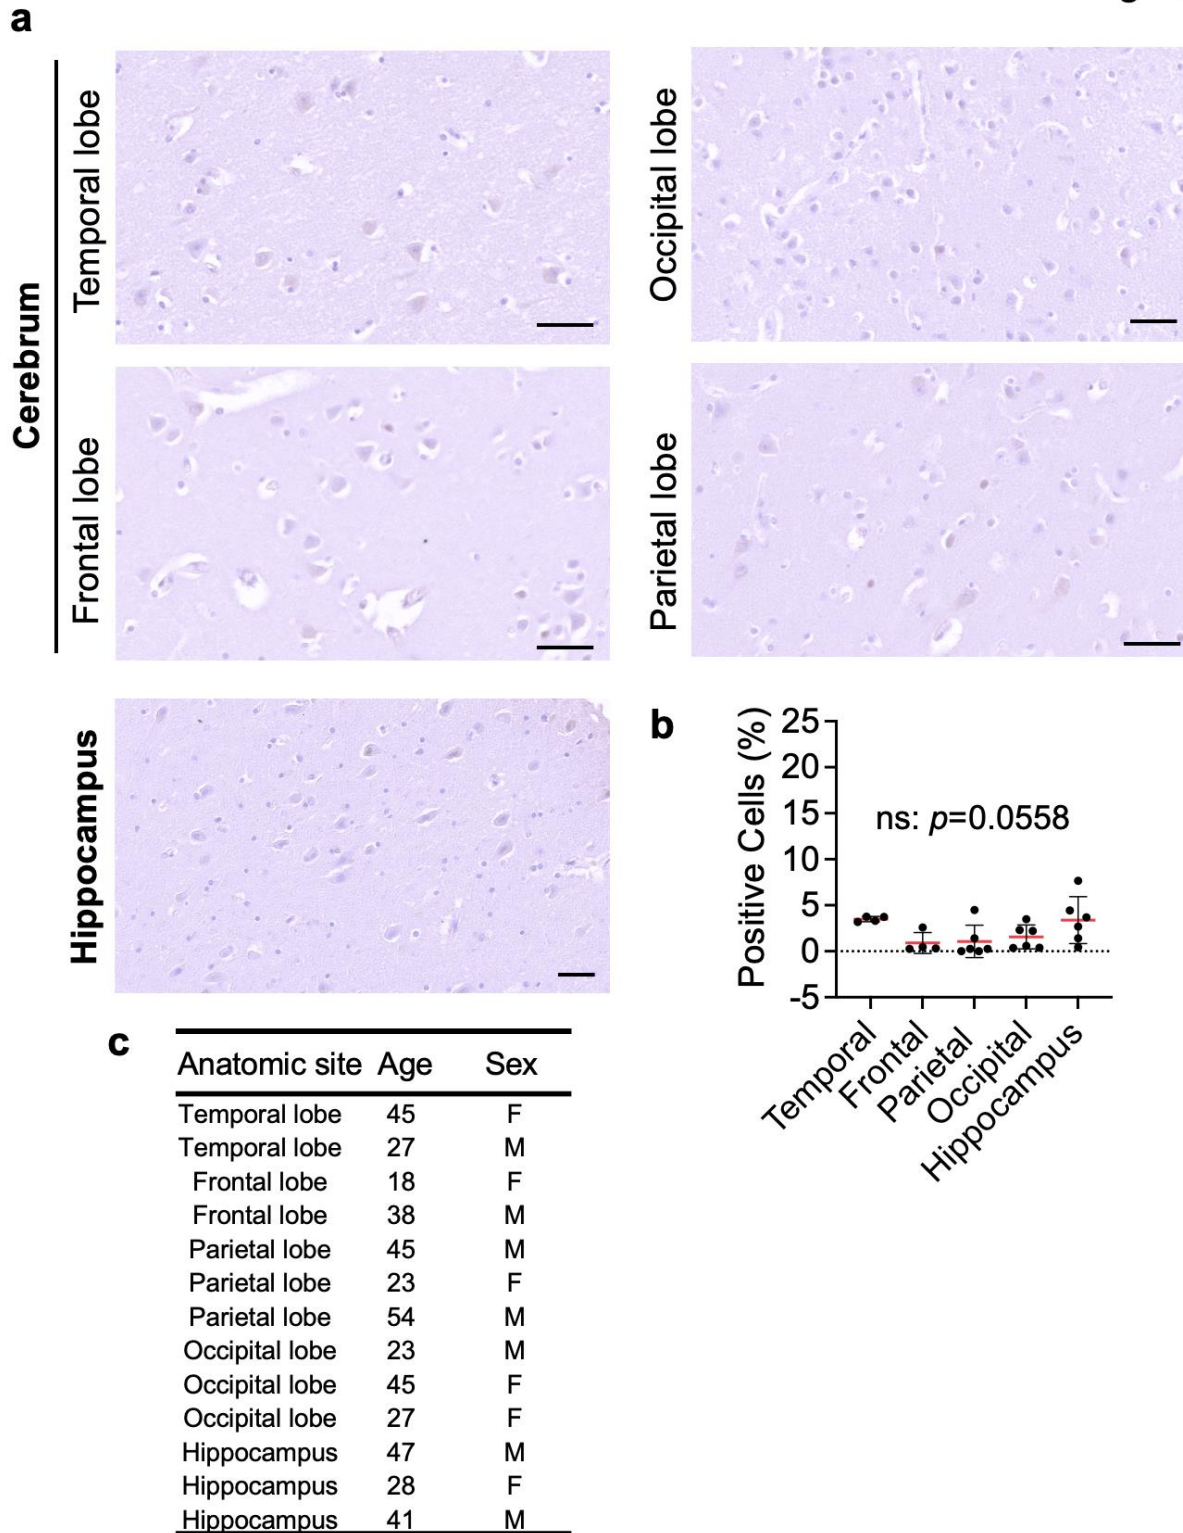

**Caption:** **a** Immunostaining of Bax $\Delta$ 2 proteins in different regions of human normal brains. scale bars, 50  $\mu$ m. **b** Quantitation of (a). **c** Tissue source information for (a) experiments.

Fig. S7

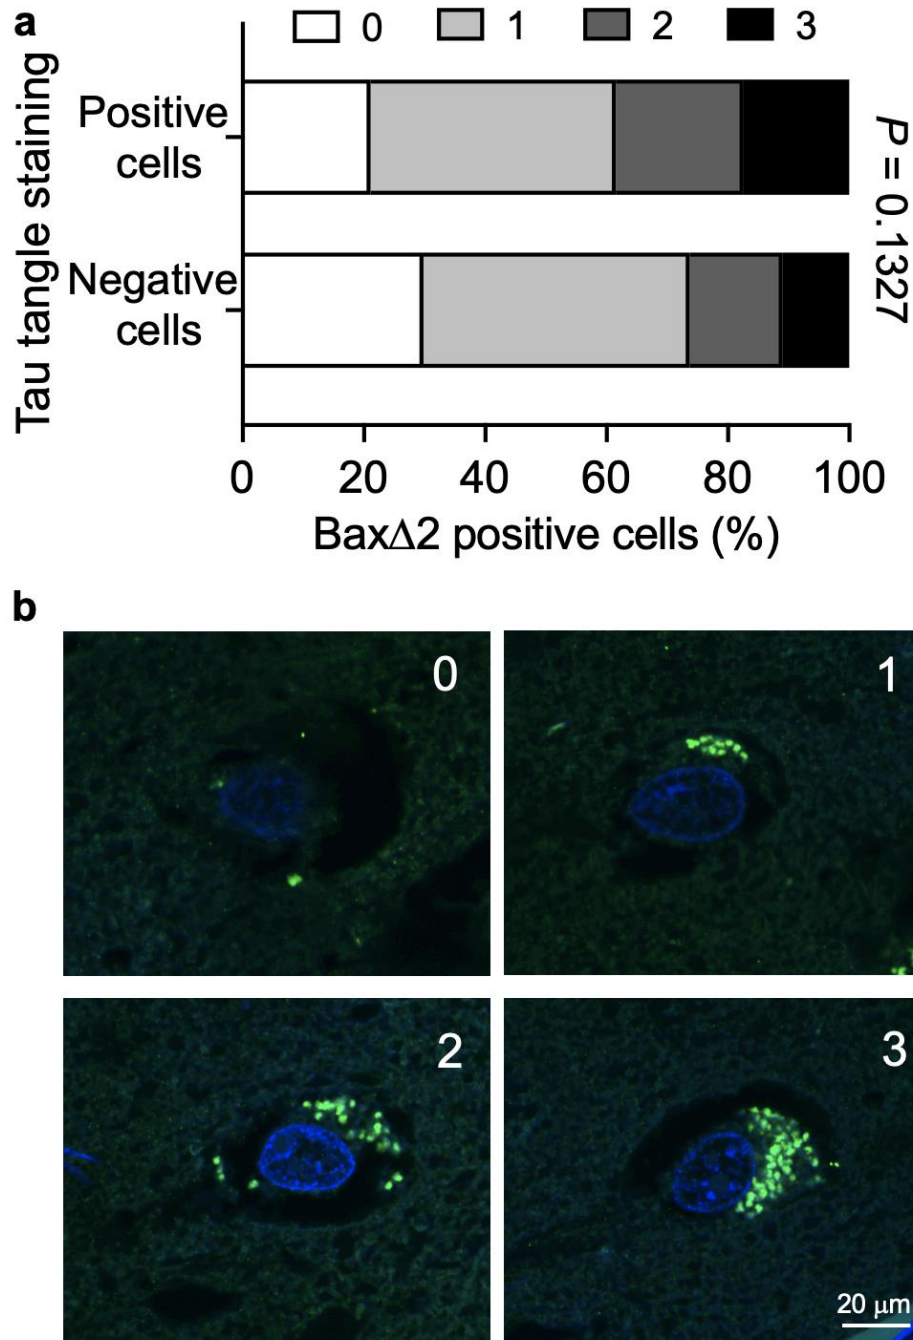

**Caption:** **a** Quantitation of correlations between Bax $\Delta$ 2 positive cells and Tau positivity from stained tissue samples in Figure 4. Tau-positive cells (n=60) and Tau negative cells (n=60) were analyzed in the quantitation. Bax $\Delta$ 2 positivity was classified into 4 different levels: 0, 1, 2, 3. Typical images for each score are shown in (**b**). Parametric statistical analysis was performed,  $p = 0.1327$ .



Fig. S8

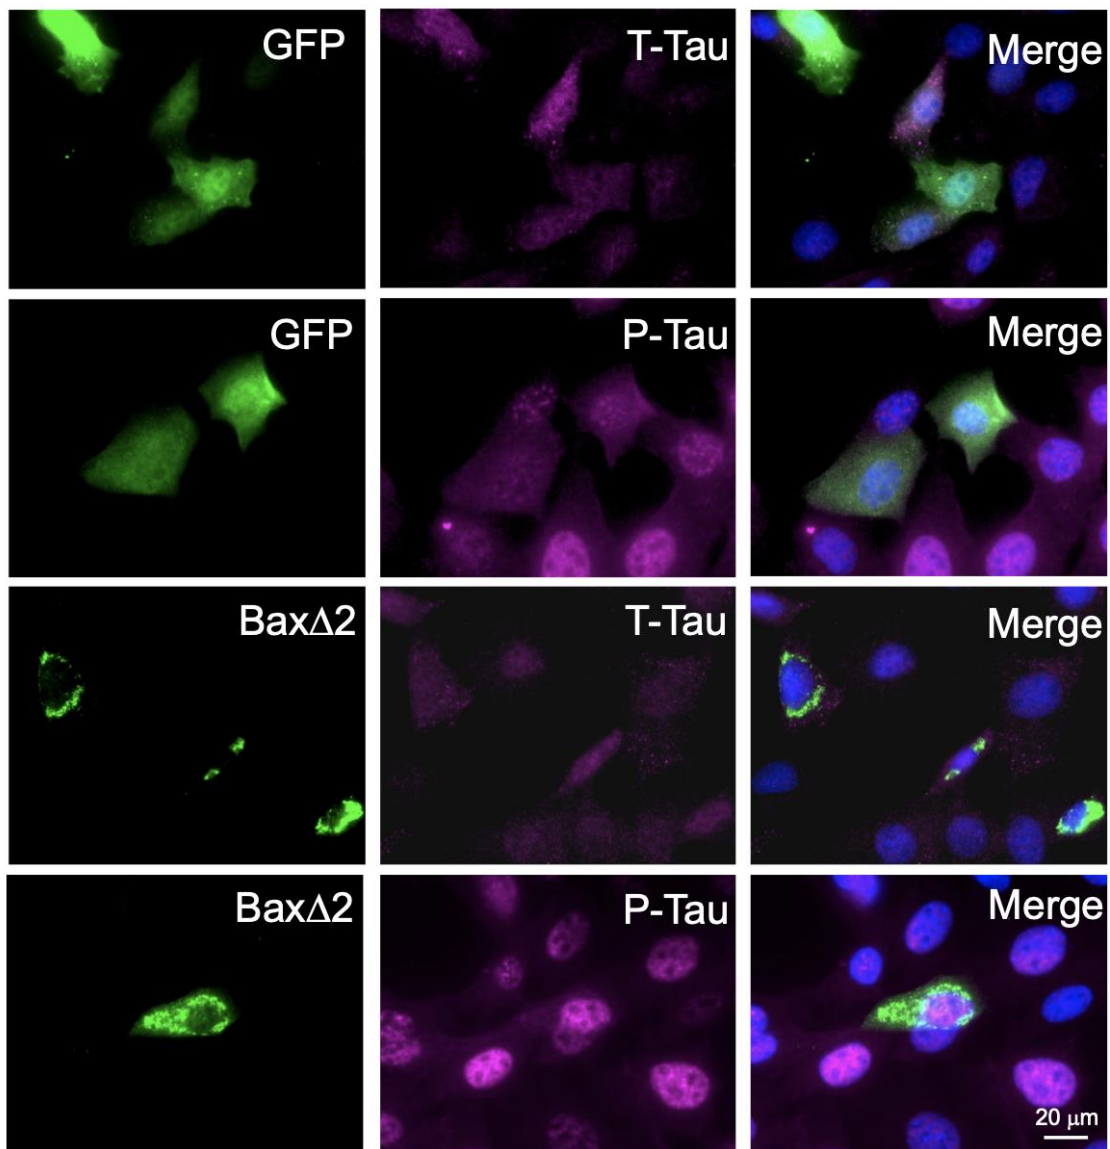

**Caption:** HT22 cells were transfected with GFP, Bax $\Delta$ 2 followed by immunofluorescent staining for Bax $\Delta$ 2 (green) and T-Tau or P-Tau (T205) (purple), Nucleus was stained as blue. Scale bars, 20  $\mu$ m.

Fig. S9

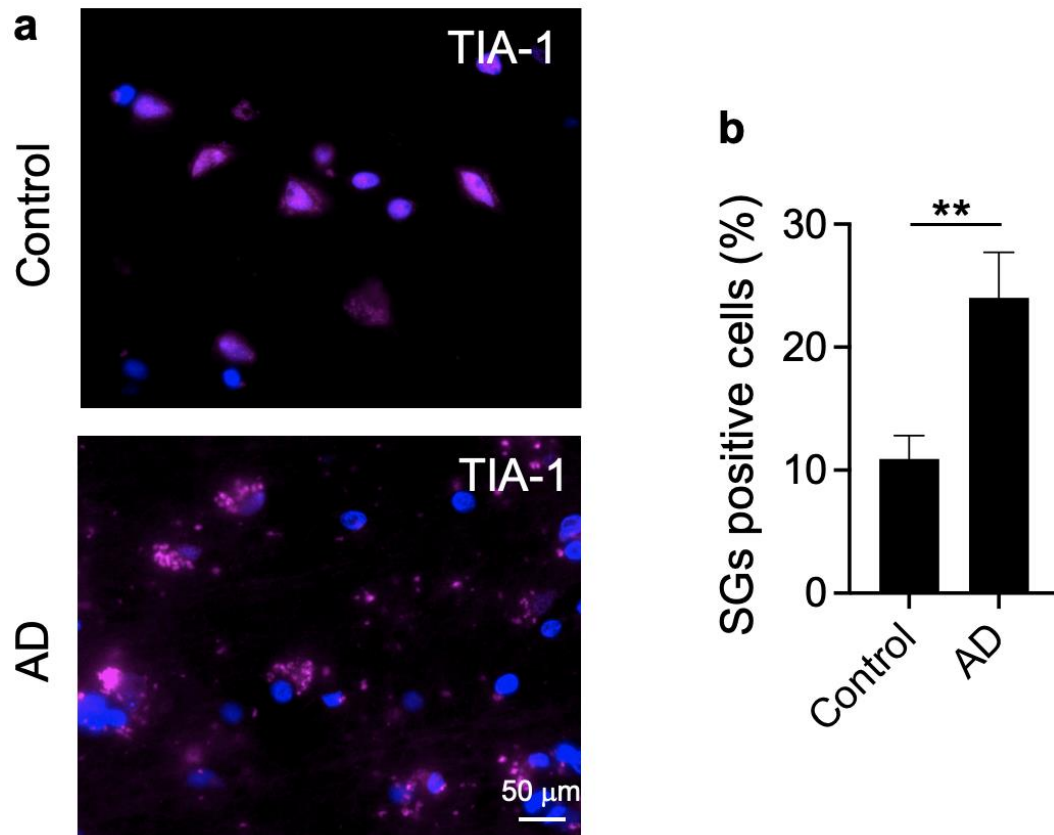

**Caption:** **a** Immunofluorescent staining of non-AD and AD human brain tissues with SGs marker TIA-1 (purple). Scale bars, 50  $\mu$ m. **b** Quantitation of (a) analyzed by parametric statistical analysis, \*\*  $p < 0.01$
